# Supplementary figures and images for: Disparate substrates for head gaze following and face perception in the monkey superior temporal sulcus
Source: eLife journal article supplement (doi:10.7554/elife.03222), 2014-07-14

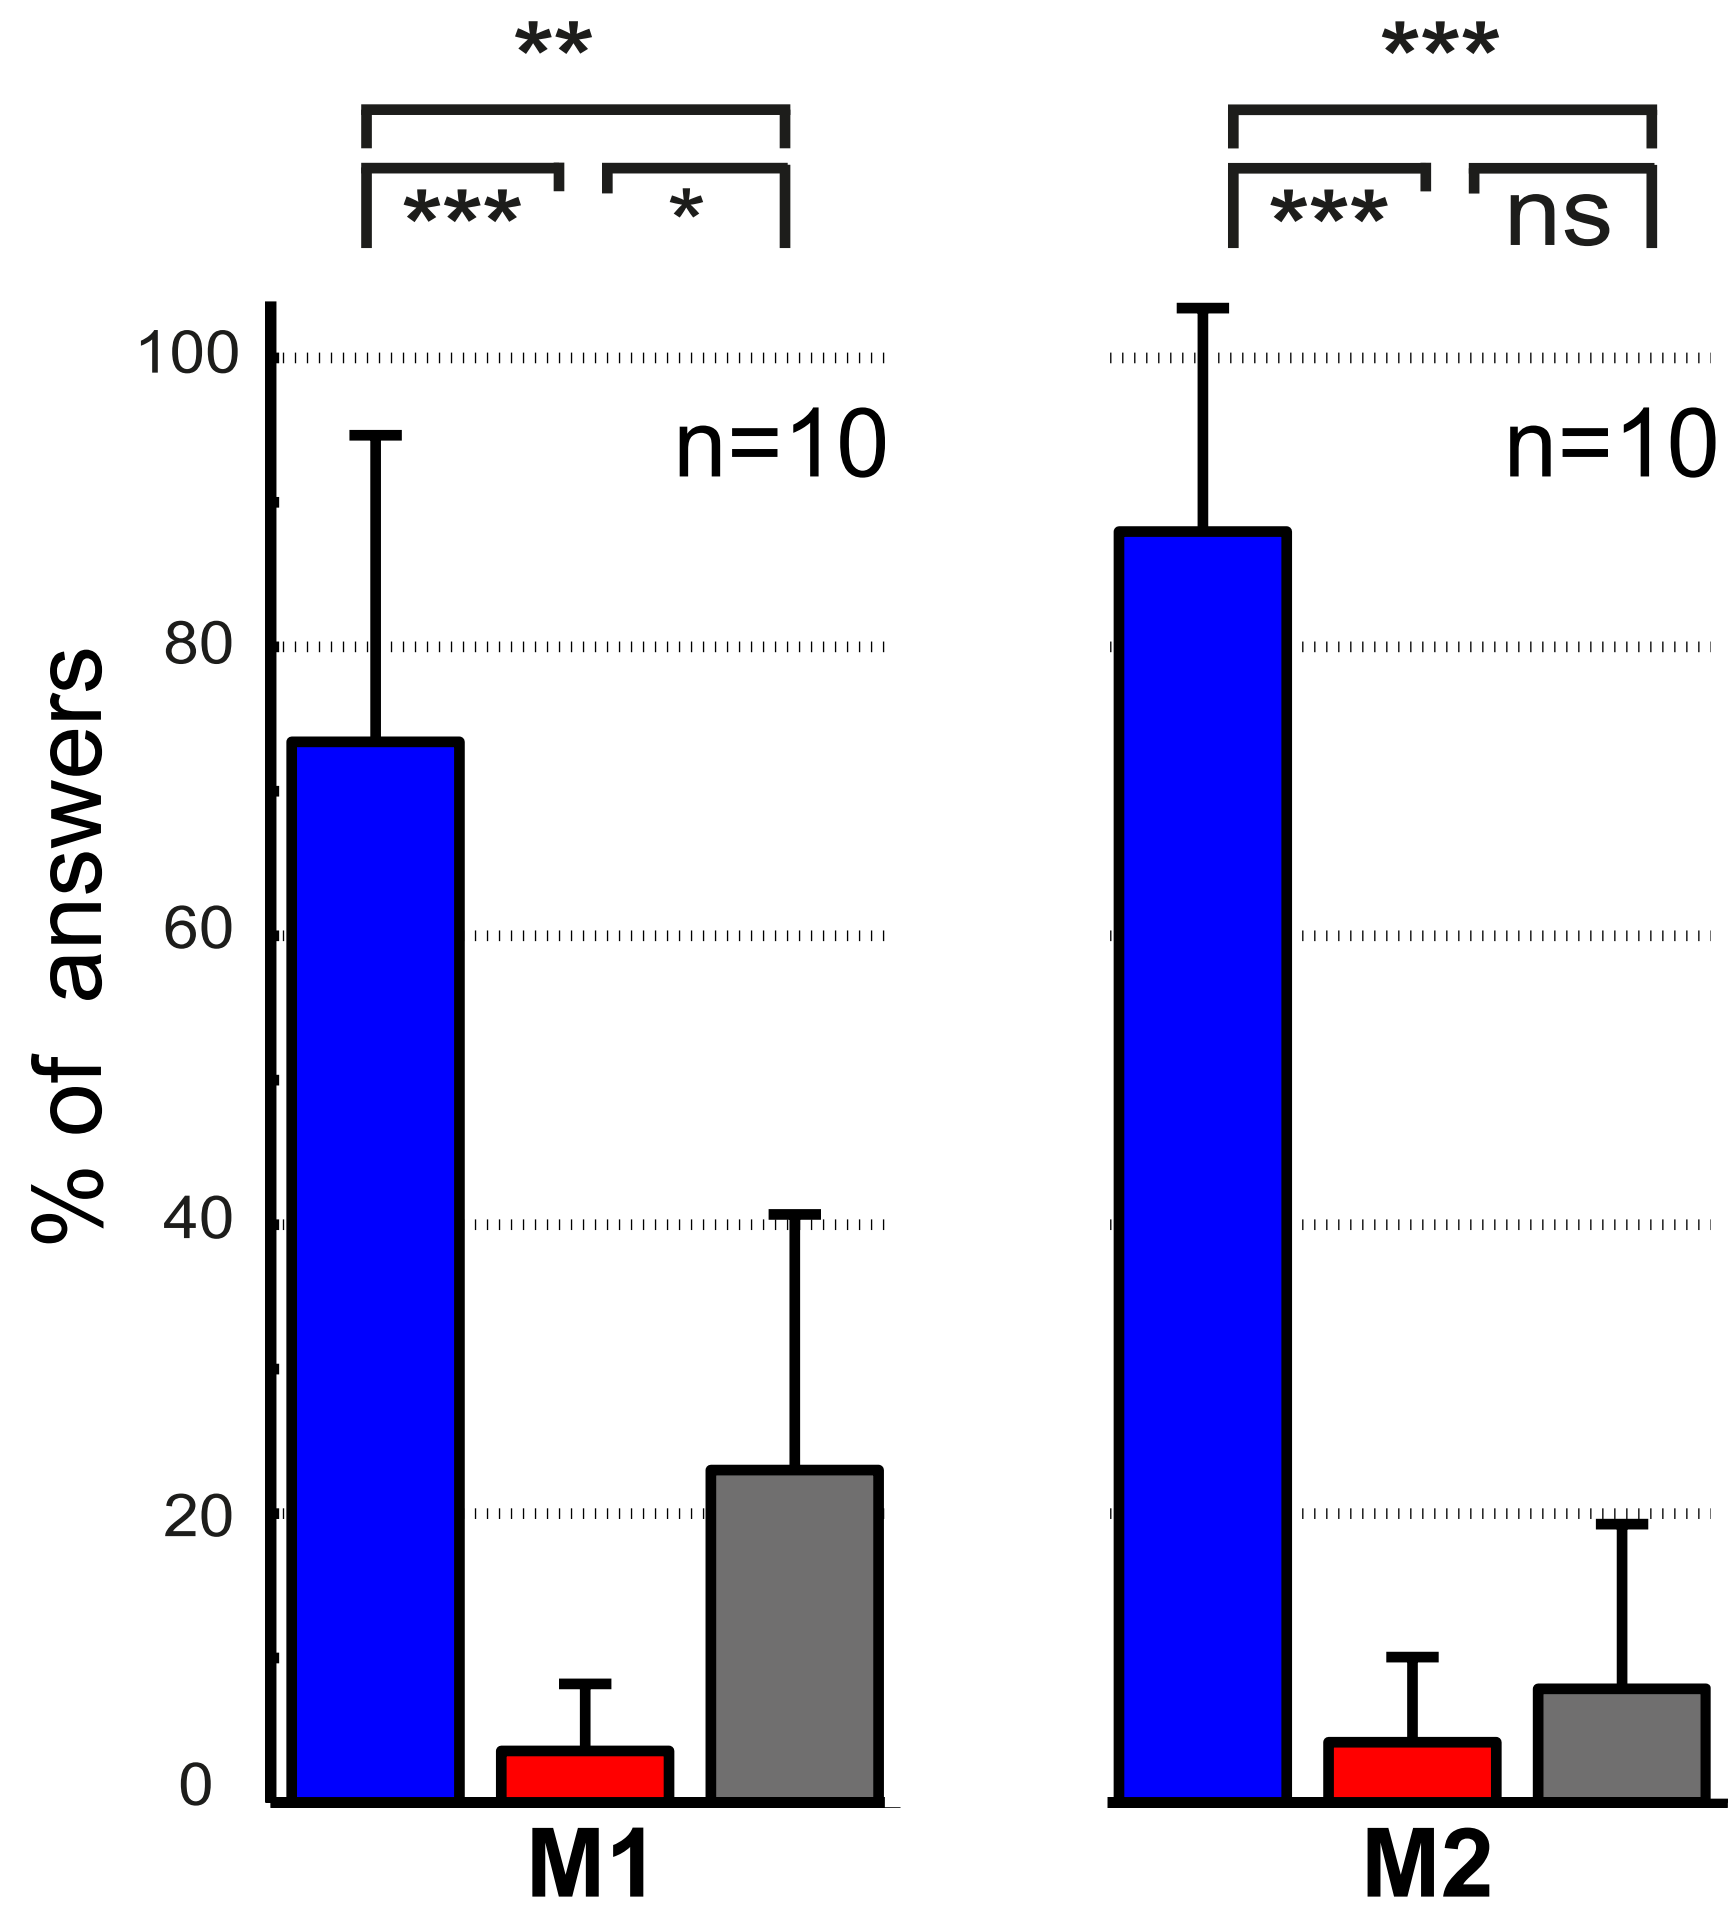

Supplement: supp [file elife-03222-supp-v1.zip]

**A**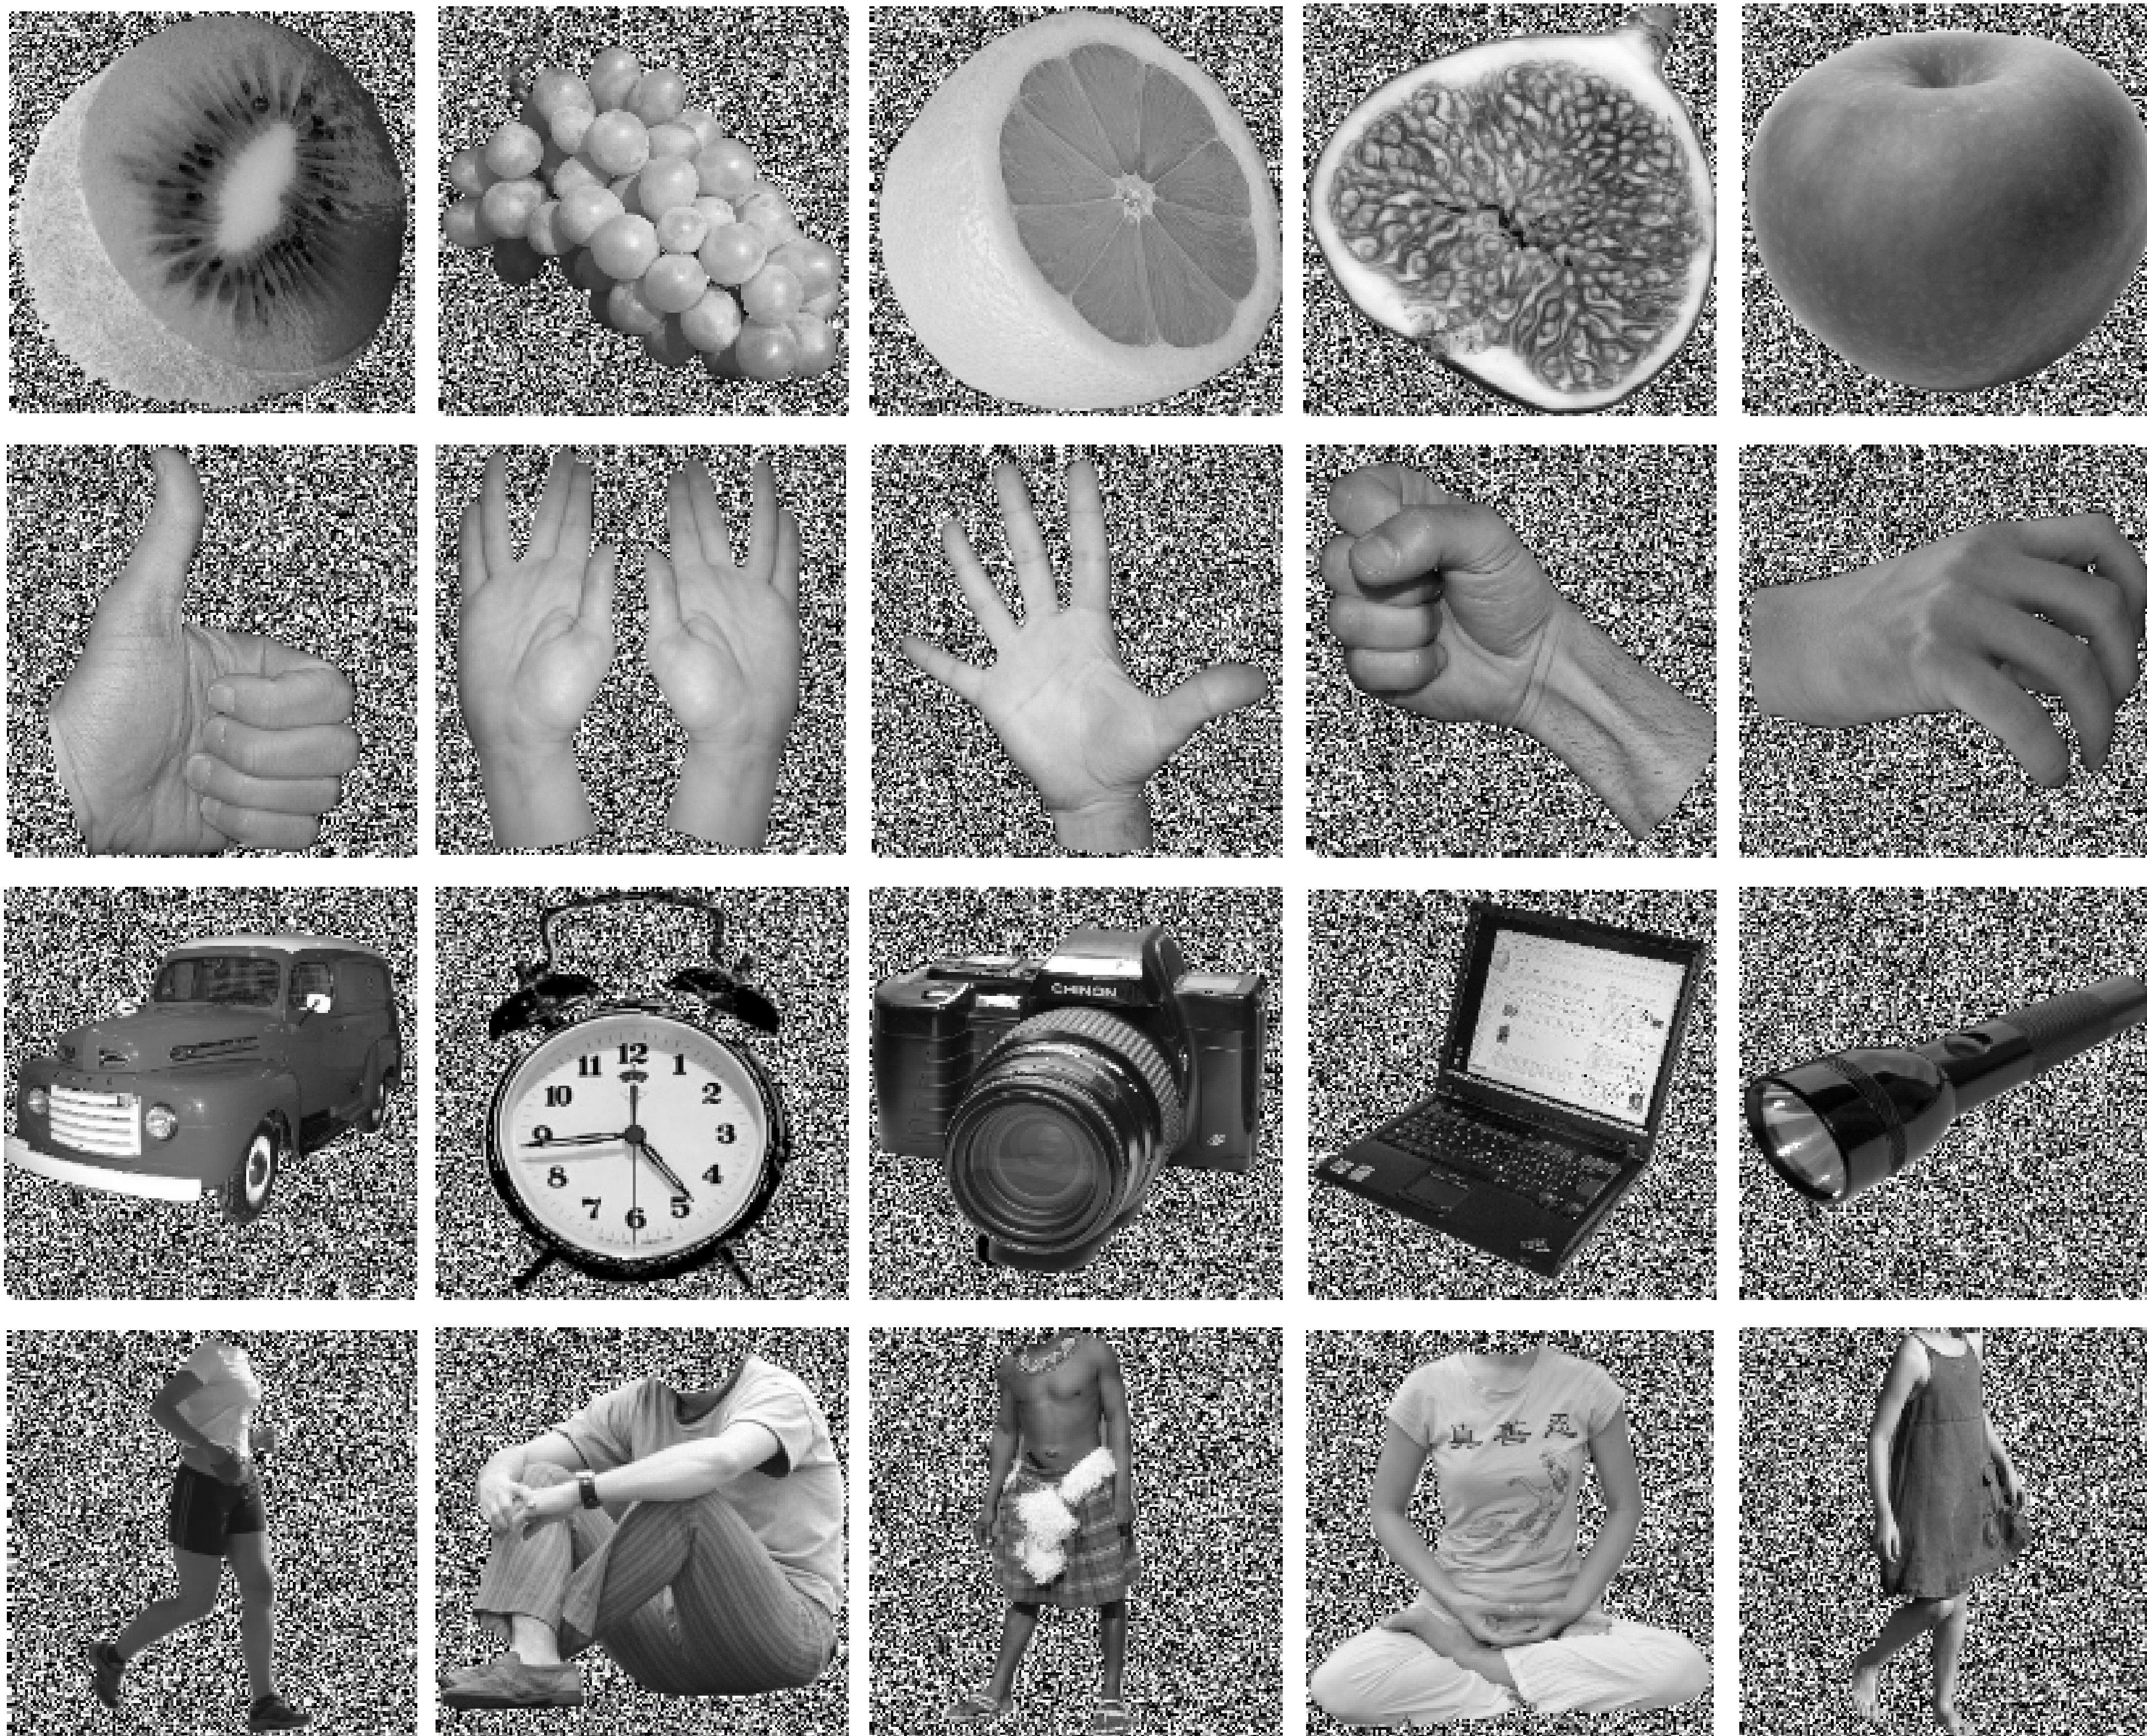**B**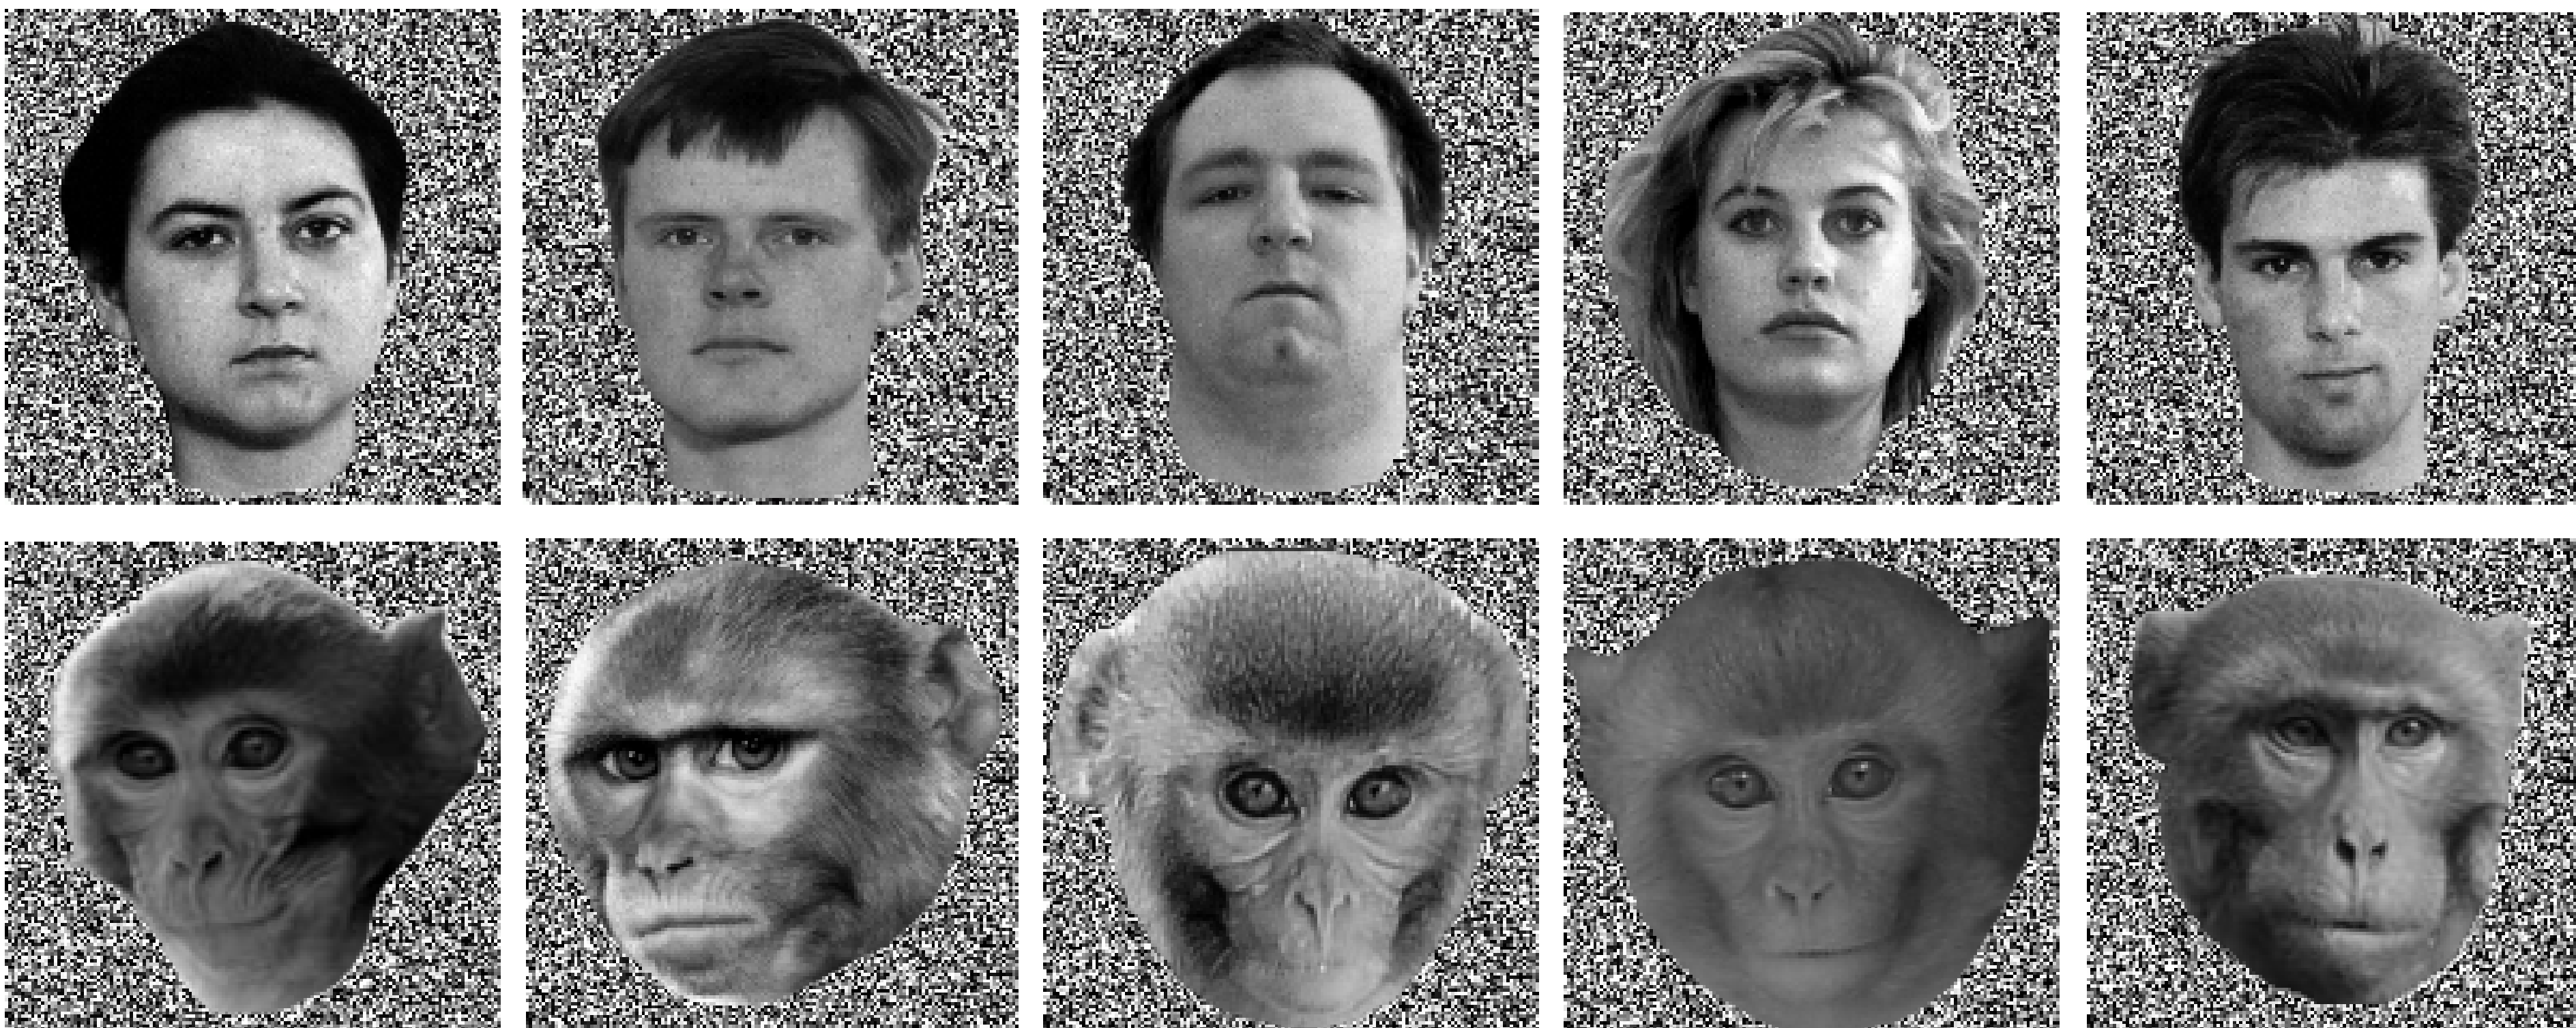**C**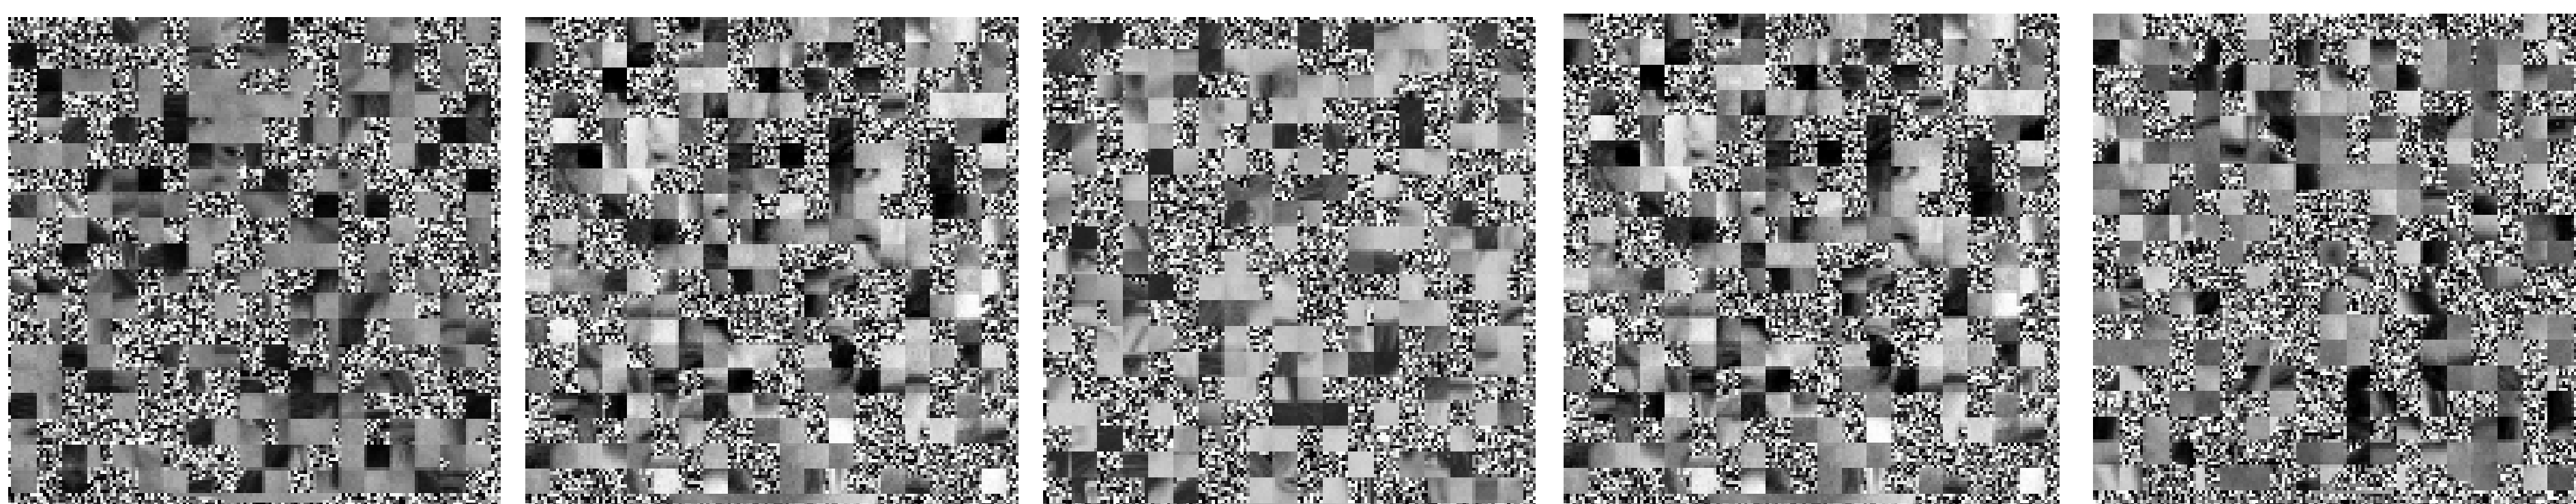

Supplement: supp [file elife-03222-supp-v1.zip]

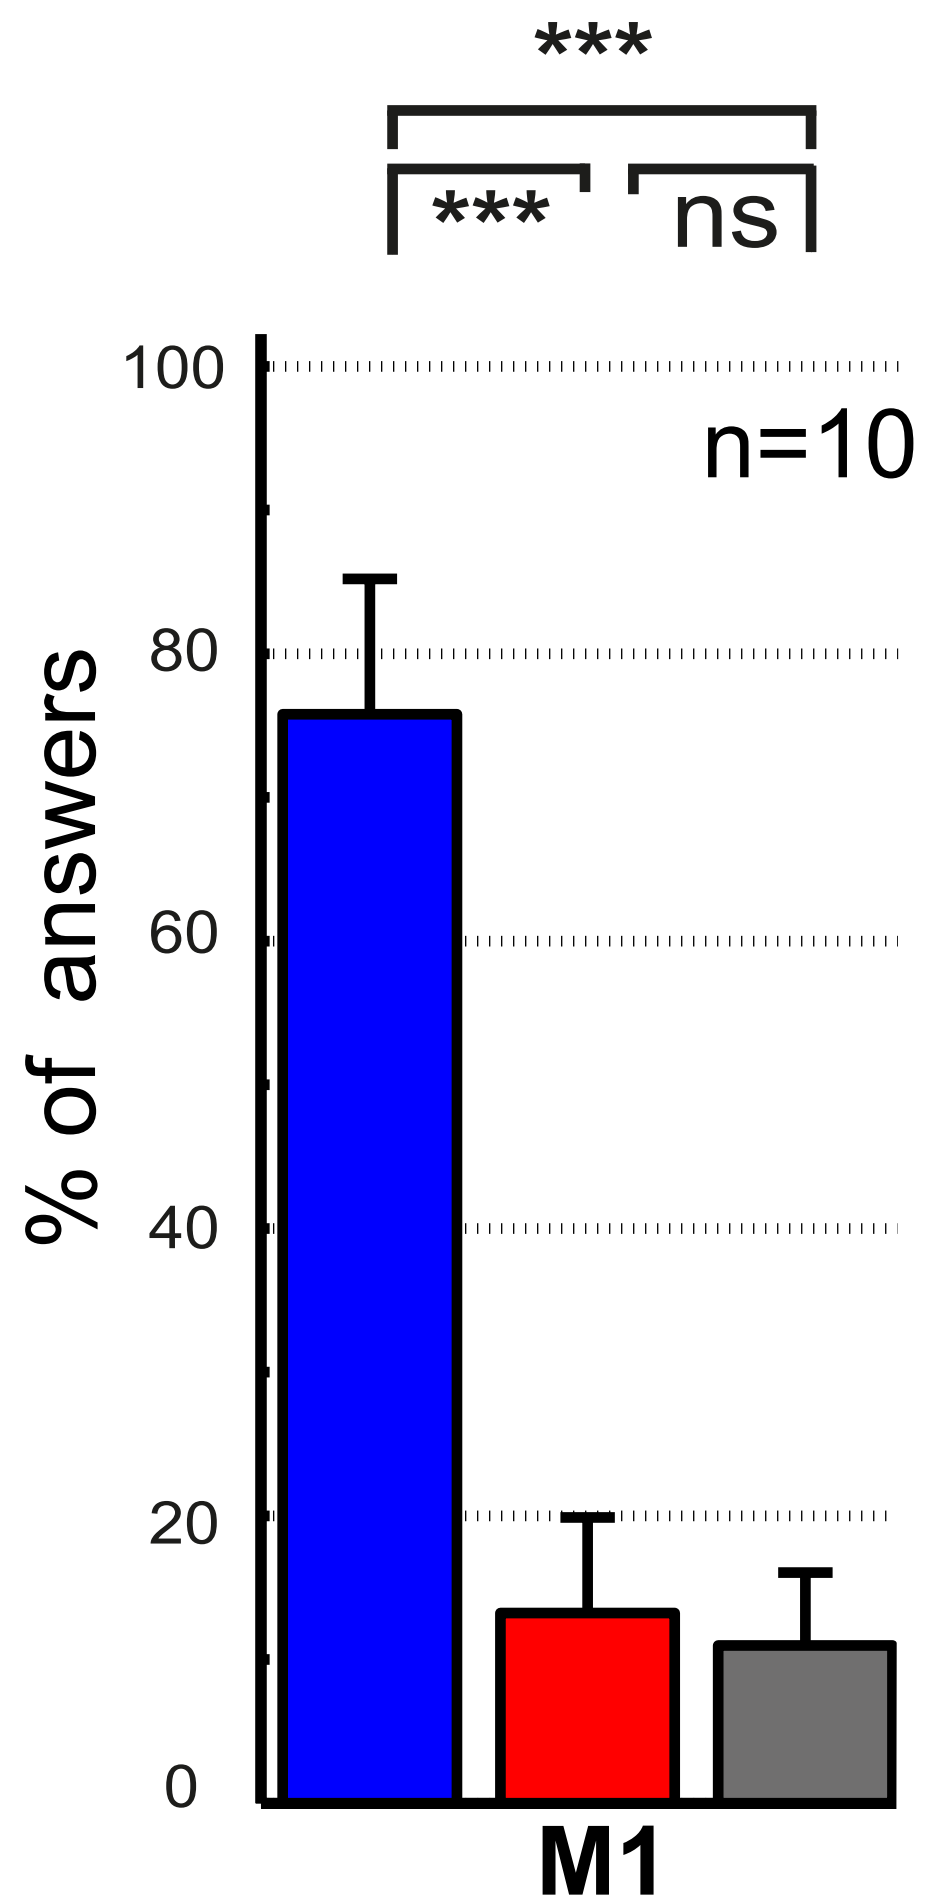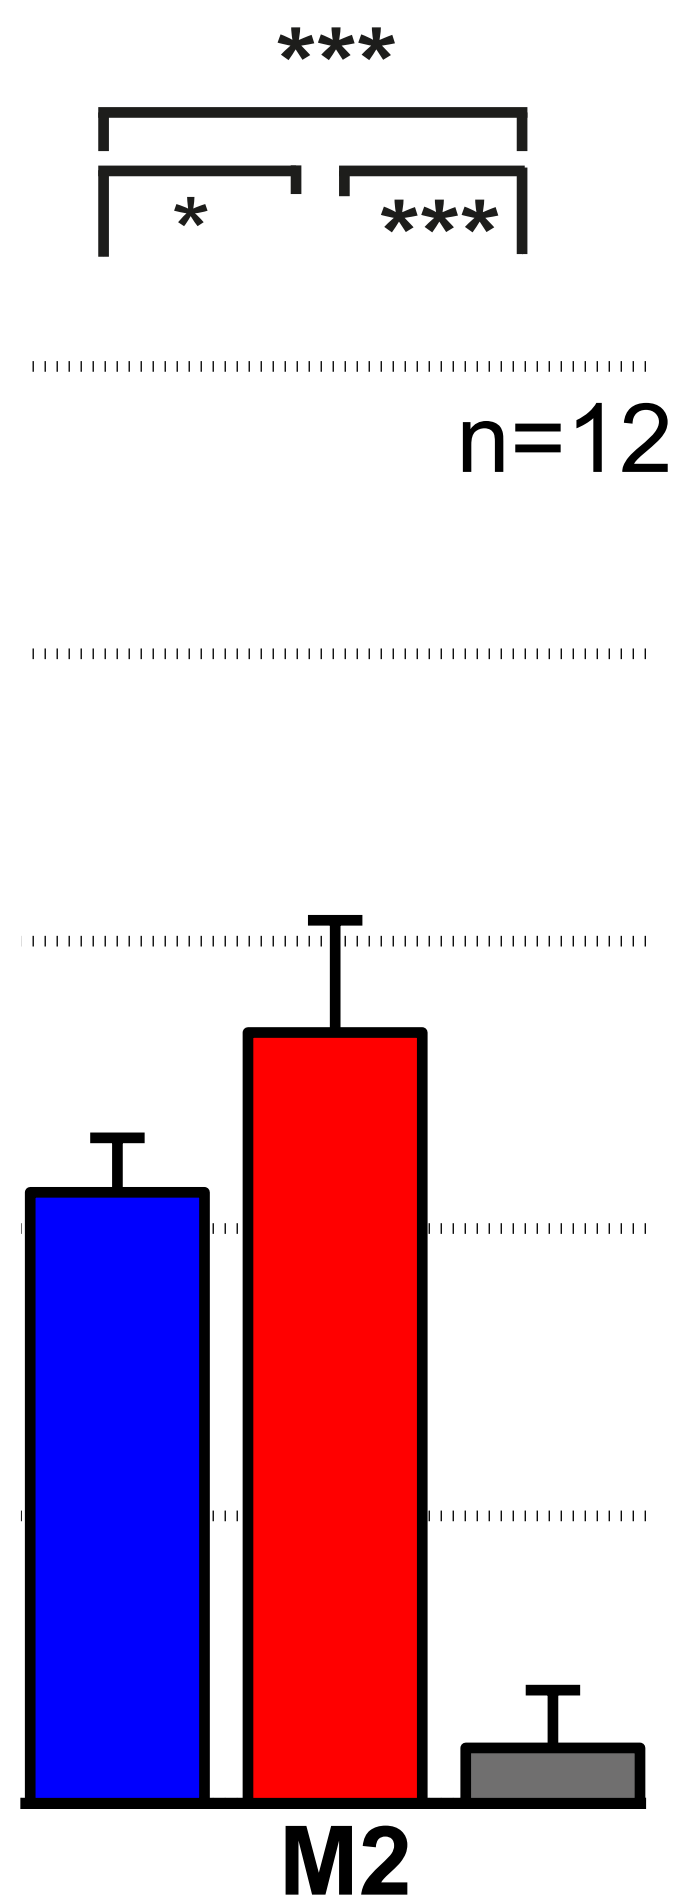

Supplement: supp [file elife-03222-supp-v1.zip]

Fig.3-fig.suppl.1

A

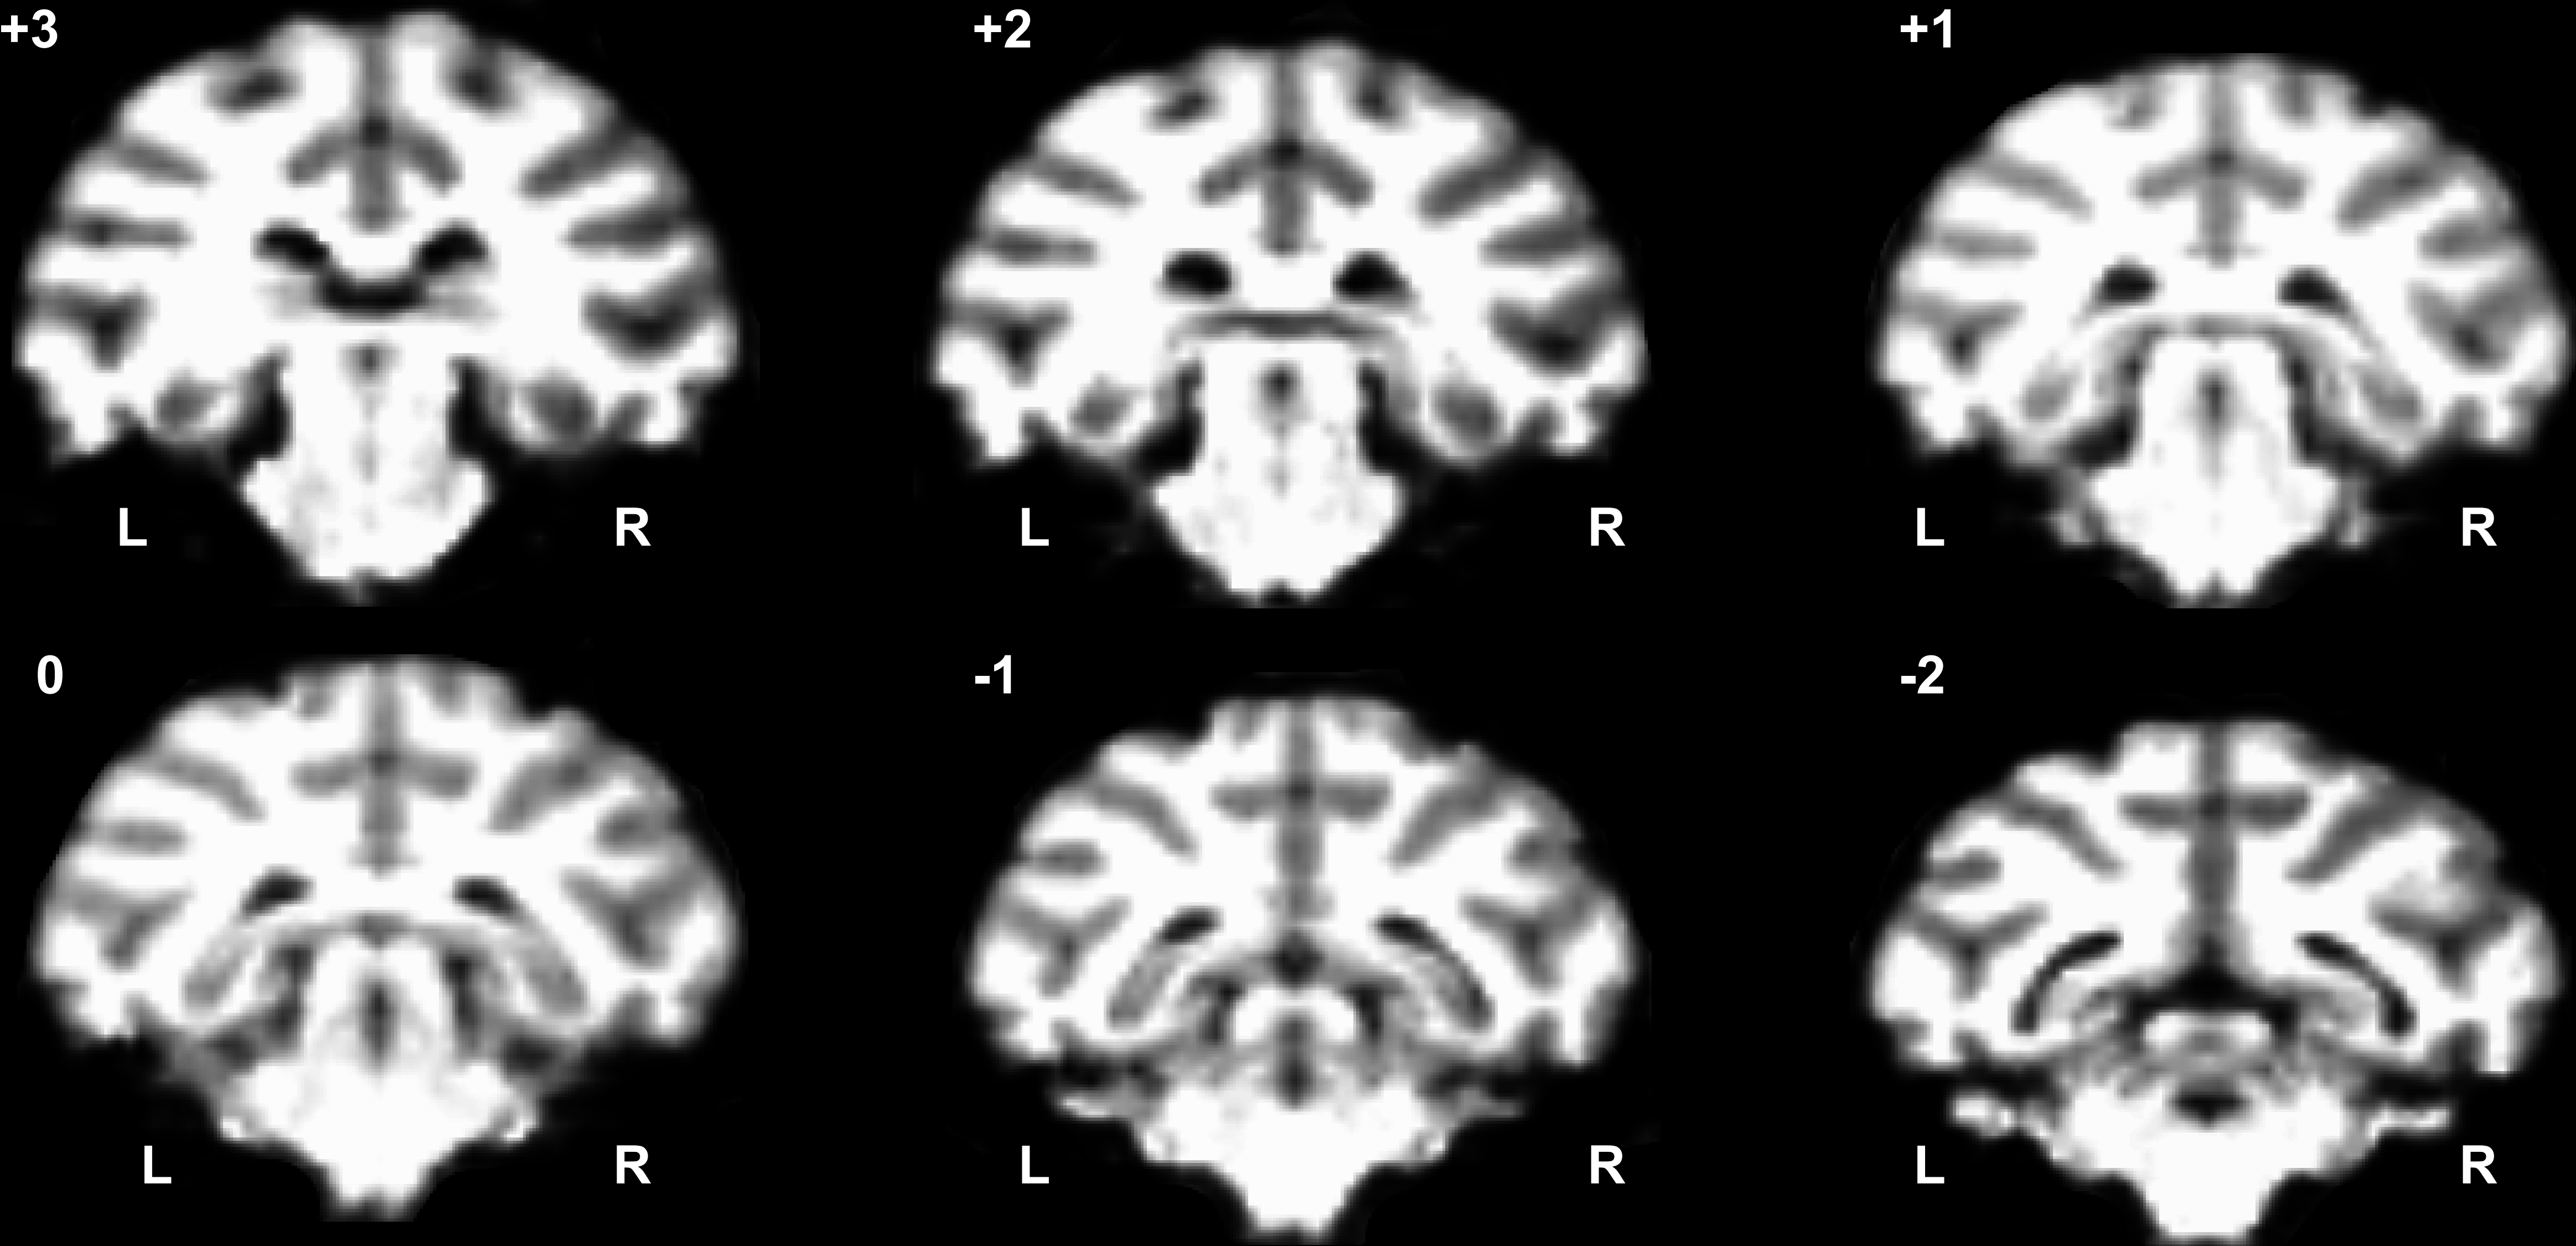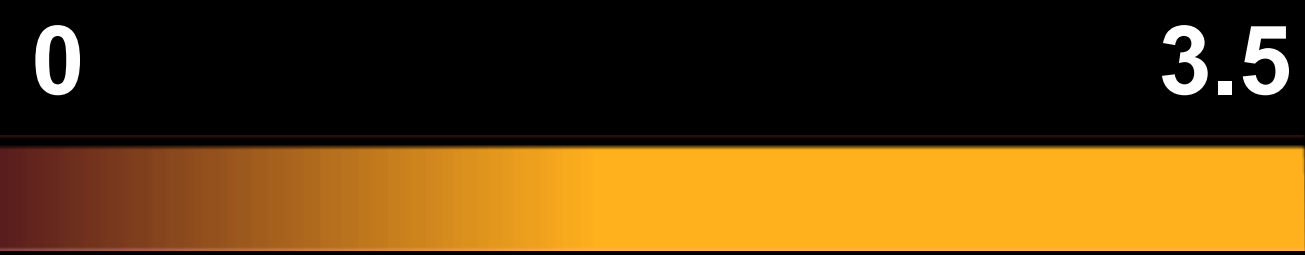

B

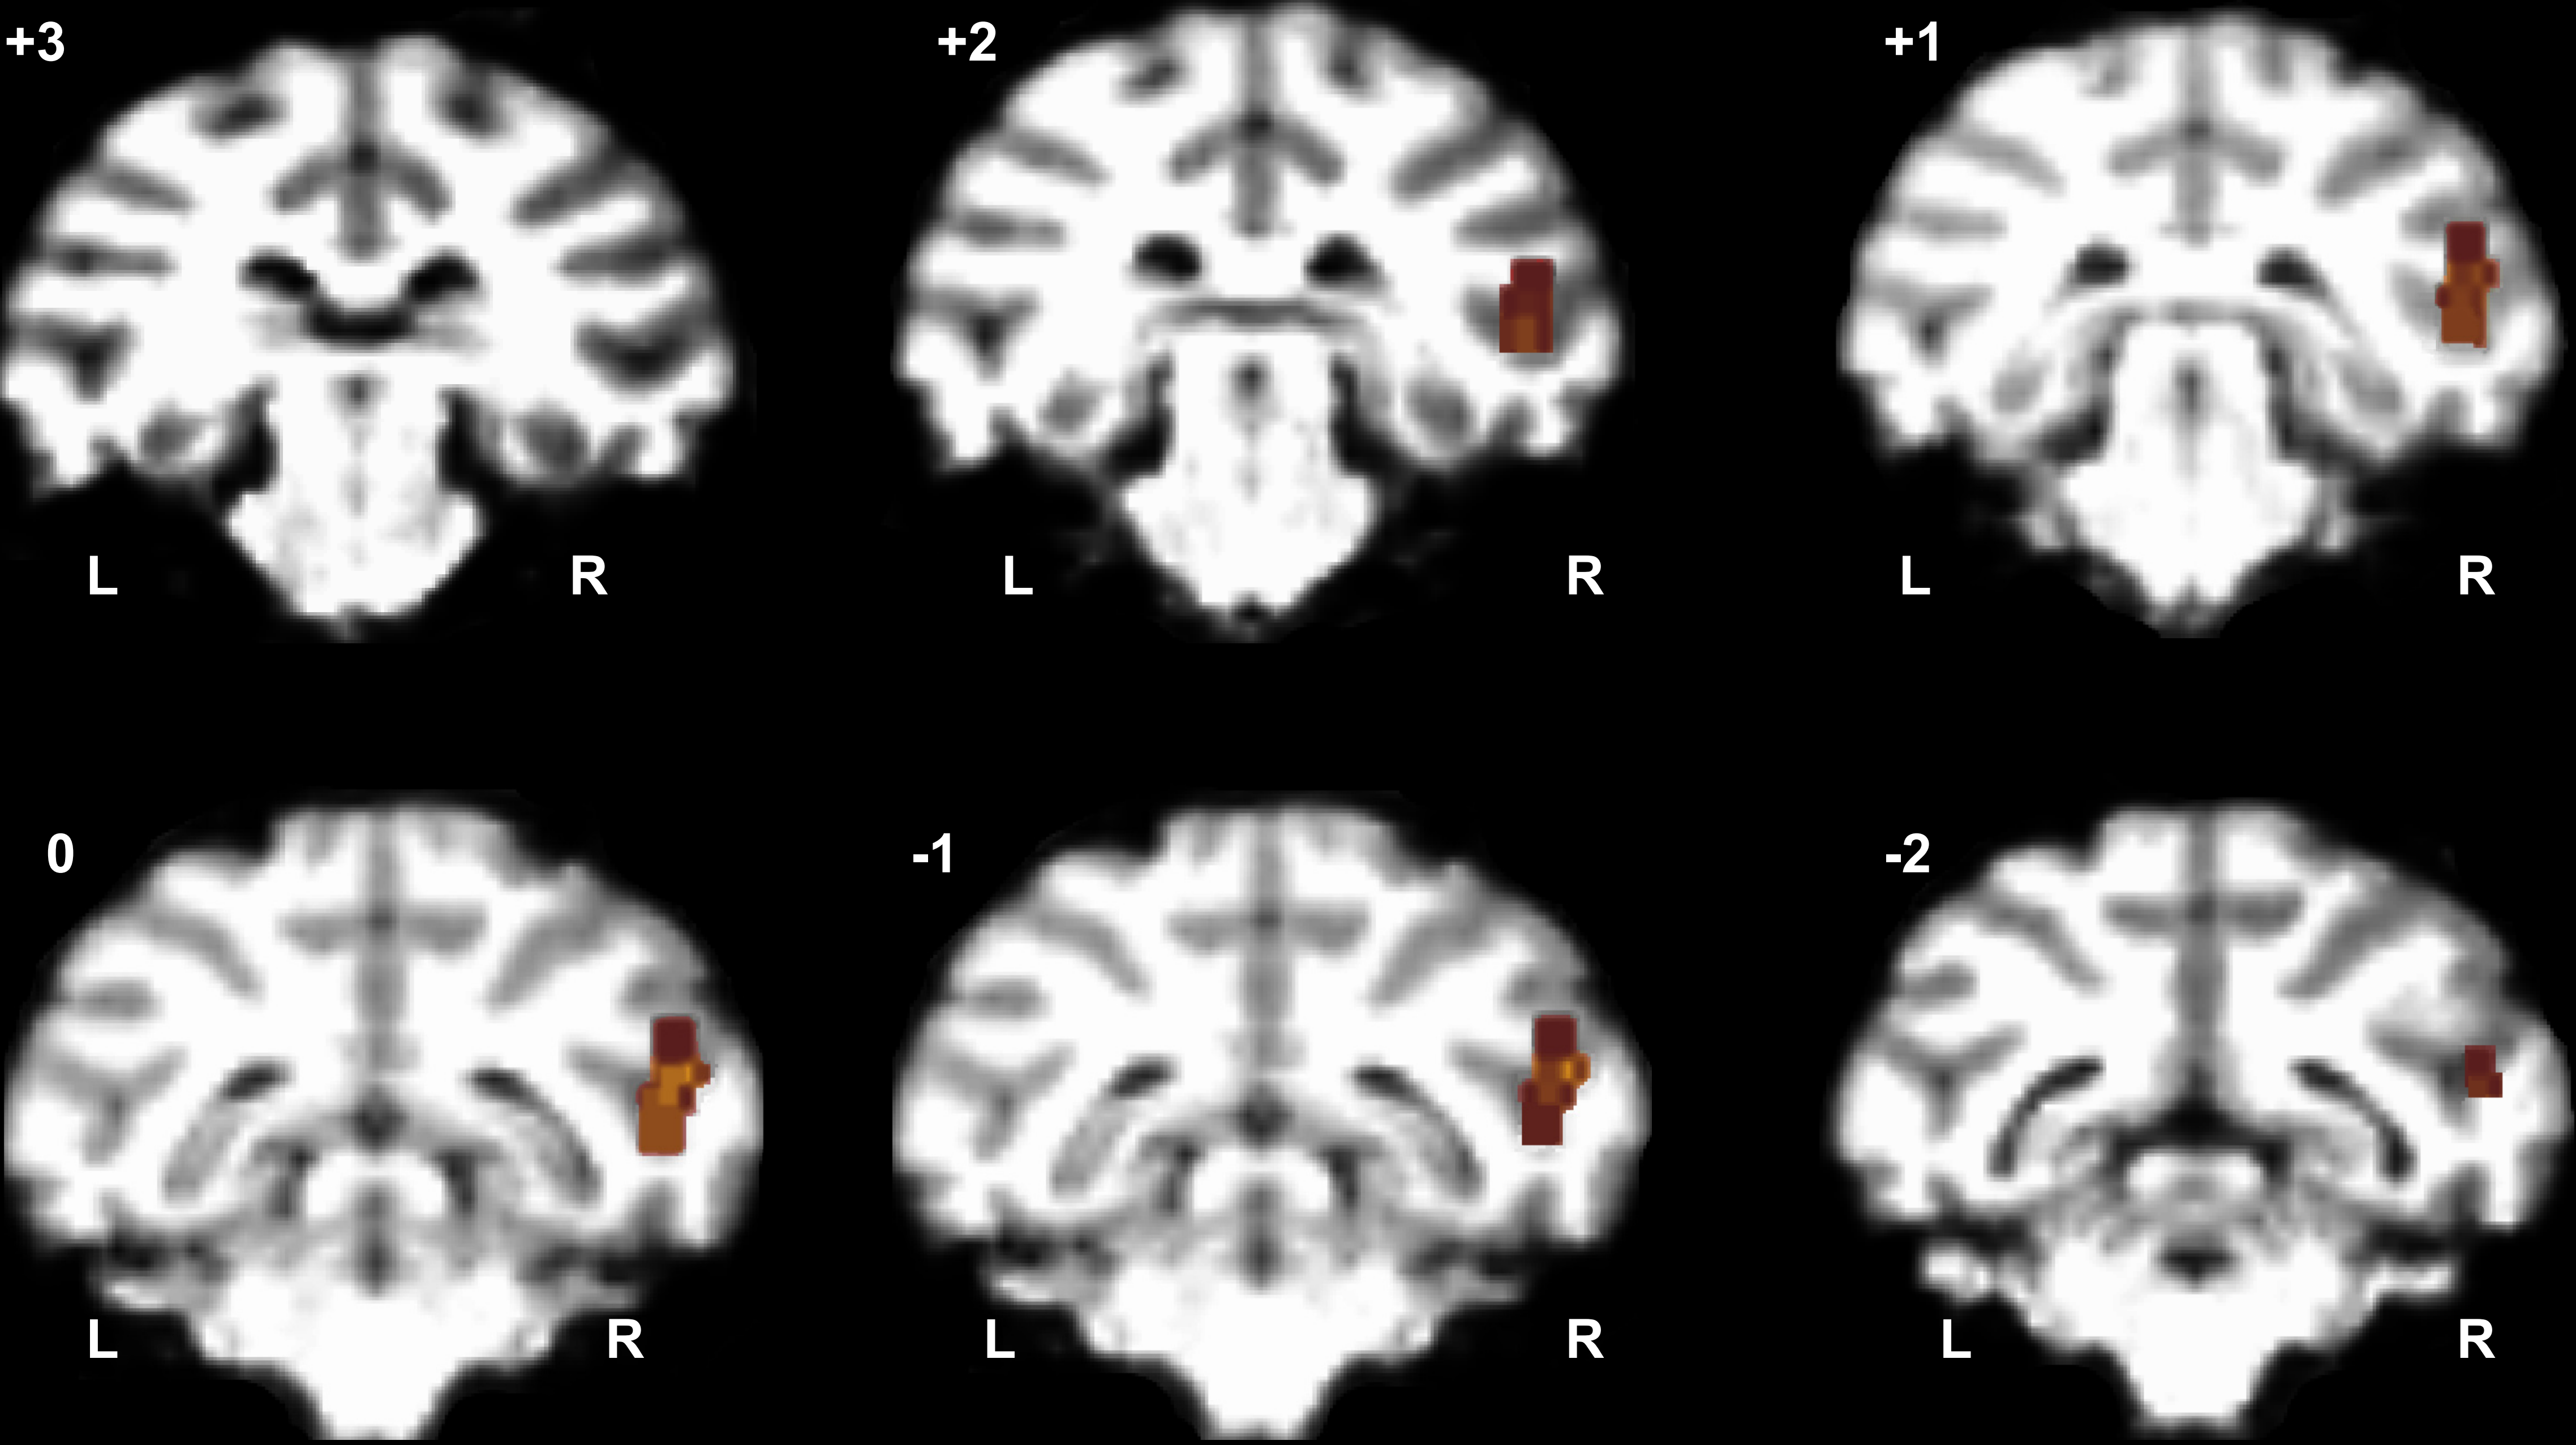

Supplement: supp [file elife-03222-supp-v1.zip]
